# Supplementary material for: Can Decision Support Systems Help Improve the Sustainable Use of Fungicides in Wheat?
Source: MDPI journal article supplement (doi:10.3390/su142315599), 2022-11-23
Supplement: s1 [file s1]

**Table S1.** Temperature, precipitation, hours of leaf wetness and STB infection conditions (leaf wetness by “Weihsfen” sensor  $\geq 98\%$  over more than 36h) in detail for the month May and June of the observed vegetation period at the trail locations Barlt, Futterkamp and Kluvensiek from 2019 to 2021.

|            | Year | May  |                     |                     |                          |                                                               | June |                     |                     |                          |                                                               |
|------------|------|------|---------------------|---------------------|--------------------------|---------------------------------------------------------------|------|---------------------|---------------------|--------------------------|---------------------------------------------------------------|
|            |      | T    | PP                  | h of LF $\geq 98\%$ | STB infections           |                                                               | T    | PP                  | h of LF $\geq 98\%$ | STB infections           |                                                               |
|            |      | (°C) | (l/m <sup>2</sup> ) | (h)                 | n (h of LW $\geq 98\%$ ) |                                                               | (°C) | (l/m <sup>2</sup> ) | (%)                 | n (h of LW $\geq 98\%$ ) |                                                               |
| Barlt      | 2019 | 11   | 38                  | 172                 | 2                        | 01.05. (108);<br>10.05. (64)                                  | 18   | 66                  | 2                   | 2                        | 13.06. (64);<br>17.06. (54)                                   |
|            | 2020 | 11   | 23                  | 155                 | 2                        | 03.05. (113);<br>24.05. (42)                                  | 17   | 41                  | 1                   | 1                        | 10.06. (163)                                                  |
|            | 2021 | 10   | 91                  | 416                 | 4                        | 08.05. (111);<br>19.05. (207);<br>27.05. (42);<br>29.05. (56) | 17   | 57                  | 1                   | 1                        | 22.06. (63)                                                   |
| Kluvensiek | 2019 | 10   | 30                  | 73                  | 2                        | 10.05. (41);<br>23.05. (32)                                   | 18   | 56                  | 3                   | 3                        | 12.06. (58);<br>16.06. (42);<br>21.06. (79)                   |
|            | 2020 | 12   | 31                  | 148                 | 2                        | 02.05. (98);<br>14.05. (50)                                   | 17   | 63                  | 3                   | 3                        | 05.06. (26);<br>14.06. (46);<br>19.06. (35)                   |
|            | 2021 | 10   | 108                 | 307                 | 4                        | 06.05. (73);<br>19.05. (27);<br>25.05. (94);<br>29.05. (113)  | 18   | 118                 | 2                   | 2                        | 06.06. (66);<br>24.06. (112)                                  |
| Futterkamp | 2019 | 10   | 67                  | 272                 | 3                        | 14.05. (120);<br>24.05. (61);<br>30.05. (91)                  | 18   | 76                  | 4                   | 4                        | 01.06. (45);<br>09.06. (37);<br>17.06. (155);<br>23.06. (105) |
|            | 2020 | 11   | 29                  | 124                 | 2                        | 02.05. (87);<br>14.05. (37)                                   | 16   | 100                 | 2                   | 2                        | 15.06. (62);<br>21.06. (56)                                   |
|            | 2021 | 11   | 108                 | 330                 | 3                        | 01.05. (58);<br>07.05. (129);<br>16.05. (143)                 | 18   | 66                  | 1                   | 1                        | 31.06. (66)                                                   |

T = Temperature; PP = Precipitation; LW = Leaf wetness

**Table S2.** Analyses of variance (ANOVAs) for the effect of treatment (untreated control, IPM, ISIP, xarvio®, HST), cultivar (“Reform”, “Ritmo”) and their interaction on the relative efficacy of yield, necrotization and disease severities of *Septoria tritici* blotch, powdery mildew, stripe rust, and leaf rust.

| Relative efficacy       | Effect               | <i>df</i> | <i>F</i> | <i>p</i> |
|-------------------------|----------------------|-----------|----------|----------|
| Yield                   | Cultivar             | 26        | 0.1187   | 0.7332   |
|                         | Treatment            | 203       | 56.3937  | < 0.0001 |
|                         | Cultivar x Treatment | 203       | 0.2732   | 0.8950   |
| Necrotization           | Cultivar             | 8         | 1.0137   | 0.3435   |
|                         | Treatment            | 88        | 25.7087  | < 0.0001 |
|                         | Cultivar x Treatment | 88        | 0.1995   | 0.9380   |
| Septoria tritici blotch | Cultivar             | 14        | 0.3976   | 0.5385   |
|                         | Treatment            | 136       | 101.6270 | < 0.0001 |
|                         | Cultivar x Treatment | 136       | 0.1950   | 0.9406   |
| Powdery mildew          | Cultivar             | 5         | 0.5804   | 0.4805   |
|                         | Treatment            | 52        | 31.5724  | < 0.0001 |
|                         | Cultivar x Treatment | 52        | 0.9869   | 0.4229   |
| Stripe rust             | Cultivar             | 2         | 0.0035   | 0.9578   |
|                         | Treatment            | 40        | 6.6905   | 0.0003   |
|                         | Cultivar x Treatment | 40        | 0.0033   | 1.0000   |
| Leaf rust               | Treatment            | 44        | 19.7410  | < 0.0001 |

Note that “Cultivar” and the interaction between “Cultivar” and “Treatment” are not listed for leaf rust, due to absence of the disease severities in the cultivar “RGT Reform”
